# Supplementary material for: Physiological characterization of the emergence from diapause: A transcriptomics approach
Source: PubMed Central journal article supplement (PMC6105596; doi:10.1038/s41598-018-30873-0), 2018-08-22

## **Physiological characterization of the emergence from diapause: A transcriptomics approach**

Vittoria Roncalli<sup>1\*</sup>, Stephanie A. Sommer<sup>1</sup>, Matthew C. Cieslak<sup>1</sup>, Cheryl Clarke<sup>2</sup>, Russell R. Hopcroft<sup>2</sup> and Petra H. Lenz<sup>1</sup>

<sup>1</sup> Pacific Biosciences Research Center, University of Hawai'i at Mānoa, 1993 East-West Rd., Honolulu, HI 96822, USA

<sup>2</sup> Institute of Marine Science, University of Alaska, Fairbanks, 120 O'Neill, Fairbanks, AK 99775-7220, USA

Corresponding author: Vittoria Roncalli  
Pacific Biosciences Research Center  
1993 East-West Rd.  
Honolulu, HI 96822  
Tel: (808) 956-8003  
Fax: (808) 956-6984  
E-mail: [roncalli@hawaii.edu](mailto:roncalli@hawaii.edu)

\*current address: Department of Genetics, Microbiology and Statistics, Facultat de Biologia, IRBio, Universitat de Barcelona, Av. Diagonal 643, 08028, Barcelona, Spain

**Table S1. Summary of RNASeq sequencing yields and number of sequences remaining after quality control for *N. flemingeri* adult females.** RNASeq was performed on individual females harvested at eight different time points starting at collection from depth (400-700 m; Wk0 to Wk7). RNASeq data were obtained for six females for each time point. For each female, total number of RNASeq reads, number of removed reads for low quality and the number of remaining quality filtered reads are listed. Raw sequences are publicly available through NCBI BioProject PRJNA324453.

| SAMPLE     | Total # paired ebd reads (F+R) | Quality filtered reads (F+R) | Removed (%) |
|------------|--------------------------------|------------------------------|-------------|
| Collection | 17,464,252                     | 16,587,344                   | 5.0         |
| Collection | 17,923,464                     | 17,035,224                   | 5.0         |
| Collection | 20,210,912                     | 19,244,536                   | 4.8         |
| Collection | 19,730,776                     | 18,798,468                   | 4.7         |
| Collection | 19,767,462                     | 18,764,386                   | 5.1         |
| Wk 1       | 16,129,440                     | 15,277,006                   | 5.3         |
| Wk 1       | 17,325,662                     | 16,420,758                   | 5.2         |
| Wk 1       | 20,940,104                     | 19,945,588                   | 4.7         |
| Wk 1       | 19,417,184                     | 18,471,996                   | 4.9         |
| Wk 1       | 16,761,656                     | 15,823,074                   | 5.6         |
| Wk 2       | 22,260,920                     | 21,165,876                   | 4.9         |
| Wk 2       | 19,552,998                     | 18,494,442                   | 5.4         |
| Wk 2       | 18,234,668                     | 17,299,412                   | 5.1         |
| Wk 2       | 17,563,826                     | 16,663,660                   | 5.1         |
| Wk 2       | 17,094,020                     | 16,224,650                   | 5.1         |
| Wk 3       | 14,269,654                     | 13,584,970                   | 4.8         |
| Wk 3       | 21,228,176                     | 20,155,530                   | 5.1         |
| Wk 3       | 16,042,478                     | 15,187,422                   | 5.3         |
| Wk 3       | 17,479,446                     | 16,605,228                   | 5.0         |
| Wk 3       | 14,803,794                     | 14,022,320                   | 5.3         |
| Wk 4       | 23,872,392                     | 22,508,242                   | 5.7         |
| Wk 4       | 18,233,856                     | 17,298,236                   | 5.1         |
| Wk 4       | 17,885,632                     | 16,940,638                   | 5.3         |
| Wk 4       | 20,252,666                     | 19,159,522                   | 5.4         |
| Wk 4       | 23,108,960                     | 21,877,324                   | 5.3         |
| Wk 5       | 17,320,336                     | 16,312,570                   | 5.8         |
| Wk 5       | 15,782,800                     | 14,921,072                   | 5.5         |
| Wk 5       | 22,066,006                     | 20,728,956                   | 6.1         |
| Wk 5       | 17,057,586                     | 16,203,062                   | 5.0         |
| Wk 5       | 17,792,476                     | 16,883,718                   | 5.1         |
| Wk 6       | 20,716,852                     | 19,684,926                   | 5.0         |
| Wk 6       | 12,810,994                     | 12,213,120                   | 4.7         |
| Wk 6       | 19,605,330                     | 18,479,234                   | 5.7         |
| Wk 6       | 23,340,888                     | 22,051,340                   | 5.5         |
| Wk 6       | 16,099,296                     | 15,103,994                   | 6.2         |
| Wk 7       | 12,345,606                     | 11,750,070                   | 4.8         |
| Wk 7       | 12,672,220                     | 12,038,634                   | 5.0         |
| Wk 7       | 14,805,088                     | 14,037,596                   | 5.2         |
| Wk 7       | 16,485,430                     | 15,637,432                   | 5.1         |
| Wk 7       | 11,541,294                     | 10,993,912                   | 4.7         |

**Table S2. List of differentially expressed genes (DEGs) identified in pairwise comparisons between Wk0 and all other time points (Wk1 to Wk7) in *N. flemingeri* adult females.** The list includes all DEGs (up- and down-regulated) for each paired comparison (Wk0 vs Wk1-Wk7). DEGs were identified using the Fisher exact test ( $p < 0.05$ ) and a multiple comparison correction using Benjamini-Hochberg method (false discovery rate  $< 5\%$ ) as implemented by edgeR [30].

| Pairwise comparison | DEGs  |              |                |
|---------------------|-------|--------------|----------------|
|                     | Total | Up-regulated | Down-regulated |
| Wk 0 vs Wk 1        | 6,254 | 3,885        | 2,369          |
| Wk 0 vs Wk 2        | 4,713 | 3,178        | 1,535          |
| Wk 0 vs Wk 3        | 4,537 | 2,595        | 1,942          |
| Wk 0 vs Wk 4        | 6,116 | 3,424        | 2,692          |
| Wk 0 vs Wk 5        | 6,863 | 3,821        | 3,042          |
| Wk 0 vs Wk 6        | 7,031 | 3,707        | 3,324          |

**Figure S1. Magnitude of response of differentially expressed genes (DEGs) in *N. flemingeri* adult females.** Cumulative distribution of the magnitude of differential expression of up- and down-regulated genes identified for each pair-wise comparison between diapausing females (Wk0) and females harvested at weekly intervals during a 7-week period (Wk1 to Wk7). **(A)** Fold-change ( $\log_2$  FC) difference in expression for up-regulated genes. **(B)** Fold-change ( $\log_2$  FC) difference in expression for down-regulated genes.

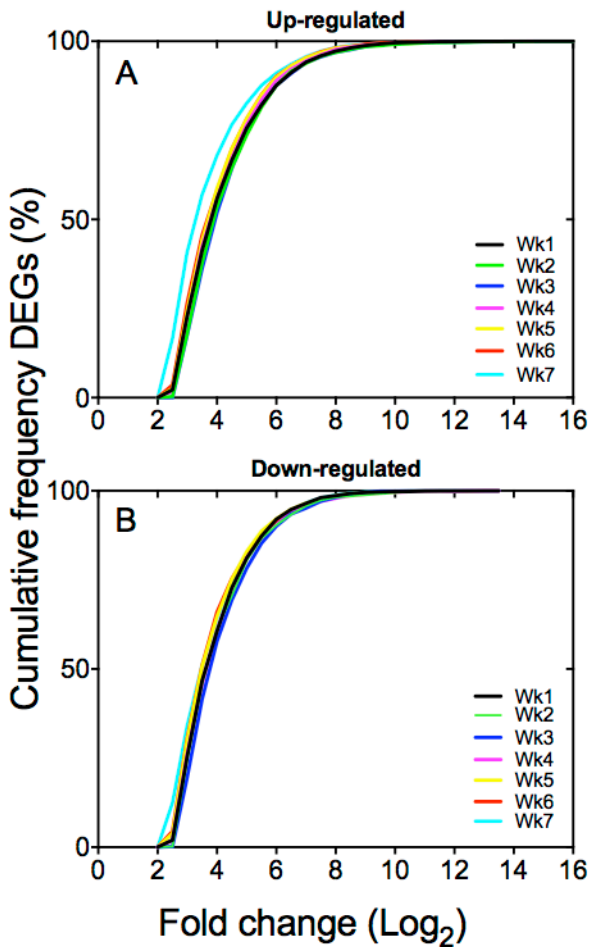

**Figure S2. KEGG pathways represented in the differentially expressed genes (DEGs) during the 7-week incubation period following collection of diapausing *N. flemingeri* from depth.** Pie chart shows relative proportion of KEGG pathways [31] represented in the DEGs identified in all pair-wise comparisons between Wk0 and Wk1-Wk7 individuals. DEGs identified for each comparison were obtained independently and annotated. Since the KEGG pathways for each comparison were similar, the results shown in the pie chart represent average percentages. KEGG pathway categories: Metabolism (M), Genetic information processing (GIP), Environmental information processing (EIP).

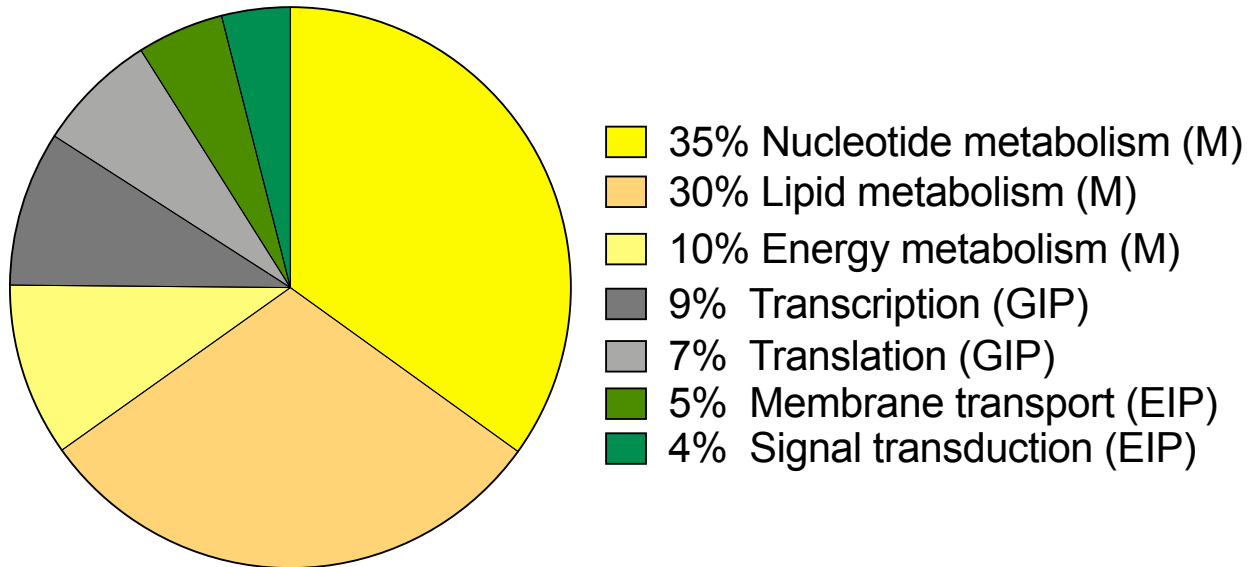

**Figure S3.** Predicted gene mapping to the oocyte meiosis pathway obtained through KEGG annotation [31]. Oocyte meiosis pathway (map04114) shows the two phases of meiosis (I and II) using *Xenopus* as the model. During meiosis I, homologous chromosomes recombine and then segregate to opposite poles, while the sister chromatids segregate from each other during meiosis II. After the arrest in prophase of meiosis I, resumption of meiosis and progression of the oocyte through two consecutive phases are driven by the maturation-promoting factor (MPF), cyclin B (CycB2/B5) and cell division cycle 2 kinase (Cdc2). Through a negative feedback loop, Cdc2 activates the anaphase-promoting complex (APC), which mediates destruction of CycB2/B5 inducing the oocyte to exit from meiosis I and to progress into interkinesis of meiosis II. To progress into meiosis II, high levels of CycB2/B5 are re-accumulated. APC is inactivated by F-box protein 43 (Emi2) and other components of the CSF (cytostatic factor) such as cyclin E (CycE) and/or high levels of the serine/threonine kinase Mos (MAPK signaling pathway). CSF antagonizes the ubiquitin ligase activity of the APC, preventing the destruction of CycB2/B5 and meiotic exit until fertilization occurs. Target annotation of this pathway for *N. flemineri* identified all the core genes required for meiosis I and II among the DEGs (Wk1-Wk7 individuals compared with Wk0). These genes are highlighted in red. Not surprisingly, considering that the pathway uses *Xenopus* as a model, genes (white boxes) such as the ones regulated by hormones (e.g. insulin like growth factor 1 receptor, progesterone receptor) were absent from the reference transcriptome.

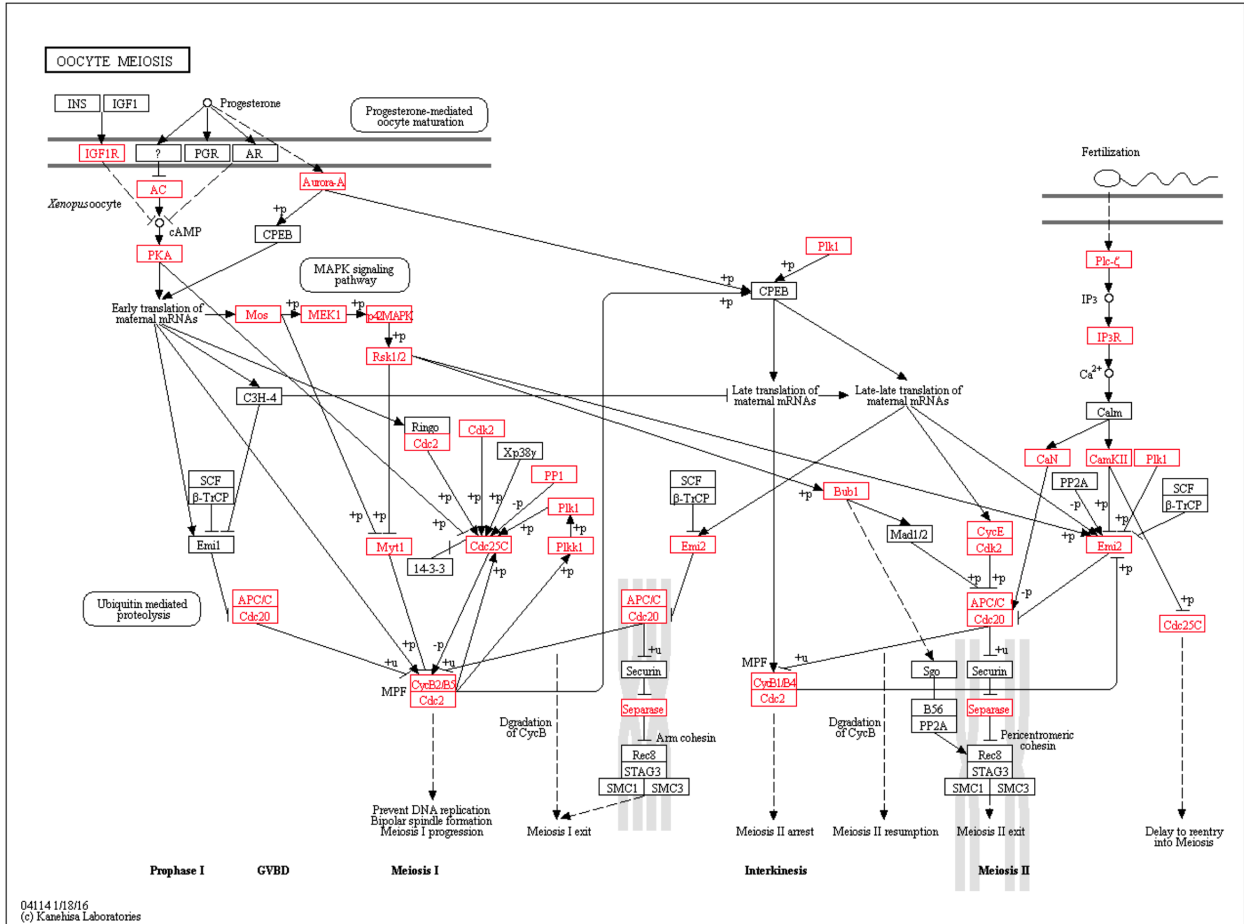

**OOCYTE MEIOSIS**

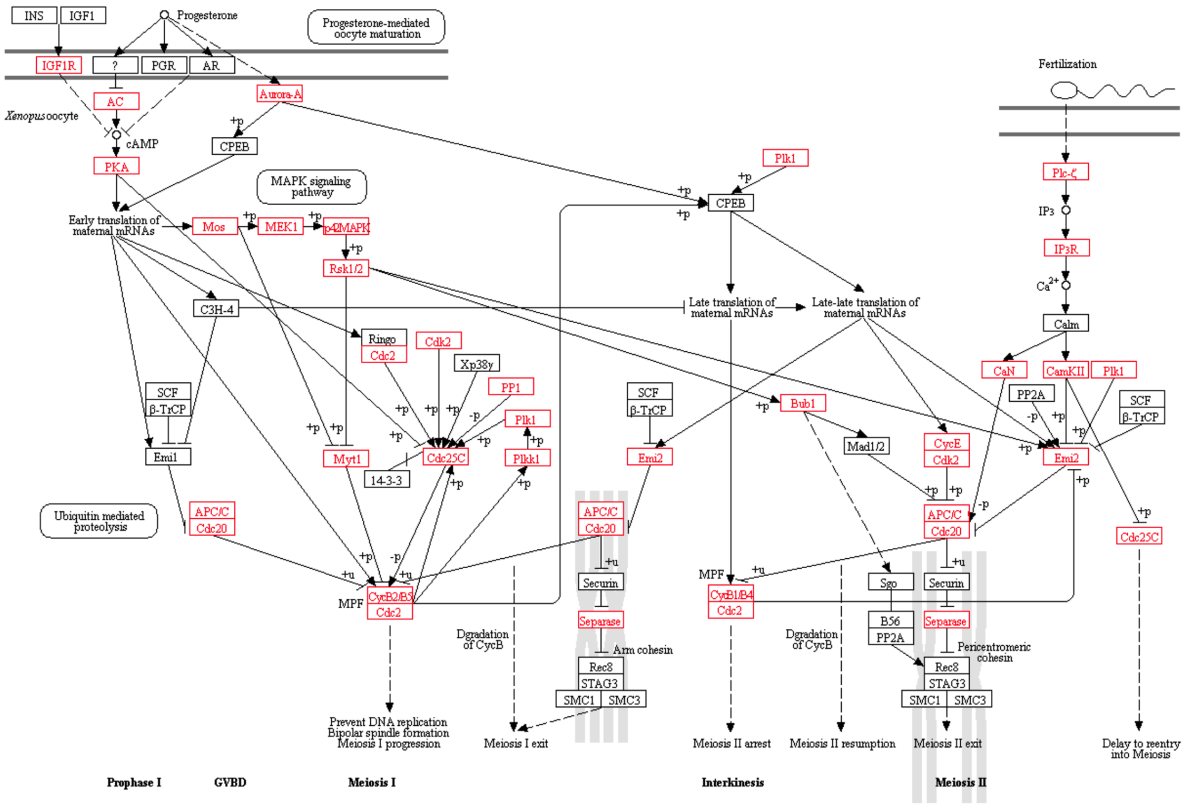

Supplement: 41598_2018_30873_MOESM1_ESM.pdf [file 41598_2018_30873_MOESM1_ESM.pdf]
